# Supplementary material
Source: HighWire-hosted journal article supplement (https://www.rcpjournals.org/highwire/filestream/10990/field_highwire_adjunct_files/1/S2_Investigations_for_adrenal_insufficiency.pdf)
Supplement: S2_Investigations_for_adrenal_insufficiency.pdf [file S2_Investigations_for_adrenal_insufficiency.pdf]

**Supplementary Table 2 Management of adrenal crisis (adapted from Arlt 2016)**

---

**Initial management of an Adrenal Crisis**

---

- **Adrenal insufficiency should be ruled out in any acutely ill patient with signs or symptoms potentially suggestive of acute adrenal insufficiency**
  - **Assess blood pressure and fluid balance status**; if clinically feasible, measure blood pressure from supine to standing to check for postural drop
  - **Take drug history**
    - **history of steroid use-any route of delivery**
    - **antiretrovirals**
    - **itraconazole or other CYP3A4 inhibitors**
- 

***Bloods:***

---

- Sodium, potassium, urea, creatinine
  - Full blood count
  - TSH, fT<sub>4</sub> (hyperthyroidism can trigger adrenal crisis; acute adrenal insufficiency can increase TSH due to loss of inhibitory control of TRH release, do not replace with thyroxine if TSH ≤ 10 mU/L)
  - **Paired serum cortisol and plasma ACTH**
- 

***Confirmatory tests***

---

- If the patient is haemodynamically stable, consider performing a **short Synacthen test** (serum cortisol at baseline and 30 min after i.v. injection of 250 micrograms ACTH<sub>1-24</sub>); however, if the patient is severely ill, confirmation of diagnosis can be safely left until after clinical recovery following implementation of emergency dose hydrocortisone treatment
  - Serum/plasma aldosterone and plasma renin (aldosterone will be low and renin high in primary adrenal insufficiency; observe special sample collection and transport conditions; can be left to confirmation of diagnosis after clinical recovery)
-
